# Supplementary material for: Interactions between fibroblastic reticular cells and B cells promote mesenteric lymph node lymphangiogenesis
Source: PubMed Central journal article supplement (PMC5573728; doi:10.1038/s41467-017-00504-9), 2017-08-28
Supplement: 41467_2017_504_MOESM1_ESM.pdf [file 41467_2017_504_MOESM1_ESM.pdf]

## Description of Supplementary Files

File Name: Supplementary Information

Description: Supplementary Figures and Supplementary Tables.

File Name: Supplementary Movie 1

Description: **Lymphatic organization in the mLN of naive mice** mLN LECs were imaged using light sheet microscopy and processed using IMARIS. The movie represents the temporal color code profile for LYVE-1 staining indicating the depth of LECs from the edge. LECs close to subcapsular sinus (SCS) appear more red where as LECs in paracortical region appears more blue. Movie 1 represents a naïve mLN where LECs are absent in the paracortical region (PCR). The blue region represents the medullary region.

File Name: Supplementary Movie 2

Description: **Lymphatic organization in the mLN of helminth infected mice** The movie represents the temporal color code profile for LYVE-1 staining indicating the depth of LECs from the edge. LECs close to subcapsular sinus (SCS) appear more red where as LECs in paracortical region appears more blue. Movie 2 represents 21dpi mLN.

File Name: Supplementary Movie 3

Description: **LECs penetrate deep into the paracortical region of the mLN** mLN LECs were imaged using light sheet microscope after 21dpi. 200 µm thick vibratome section (obtained from central part of mLN) was subjected to optical clearing before imaging. Z-stacks were acquired and processed using IMARIS. The movie shown represents the LYVE-1 staining from periphery to deep paracortical zone.

File Name: Supplementary Movie 4

Description: **Lymphatic network form a 'cup' like structure around B cell follicles post infection** 3D view of a vibratome section showing combined immunofluorescence staining for B cell follicles (B220; green) and LECs (LYVE-1; red) from mLN of 21dpi mice.

File Name: Supplementary Movie 5

Description: **Lymphatics form a 'cup' like structure around B cell follicles** 3D view of a vibratome section showing combined immunofluorescence staining for B cell follicles (B220; green) and LECs (LYVE-1; red) from mLN of naive mice.

File Name: Supplementary Movie 6

Description: **LECs and FRCs lie in close proximity to each other** Vibratome sections of paracortical regions inside 21 dpi mLN stained with the Lyve-1 (red), Podoplanin (grey) and DAPI (blue). Note the close proximity of paracortical lymphatic endothelial cells (as defined by LYVE-1+ ; red staining) and fibroblastic reticular cells (grey; PDPN+ LYVE-1-).

File Name: Peer Review File

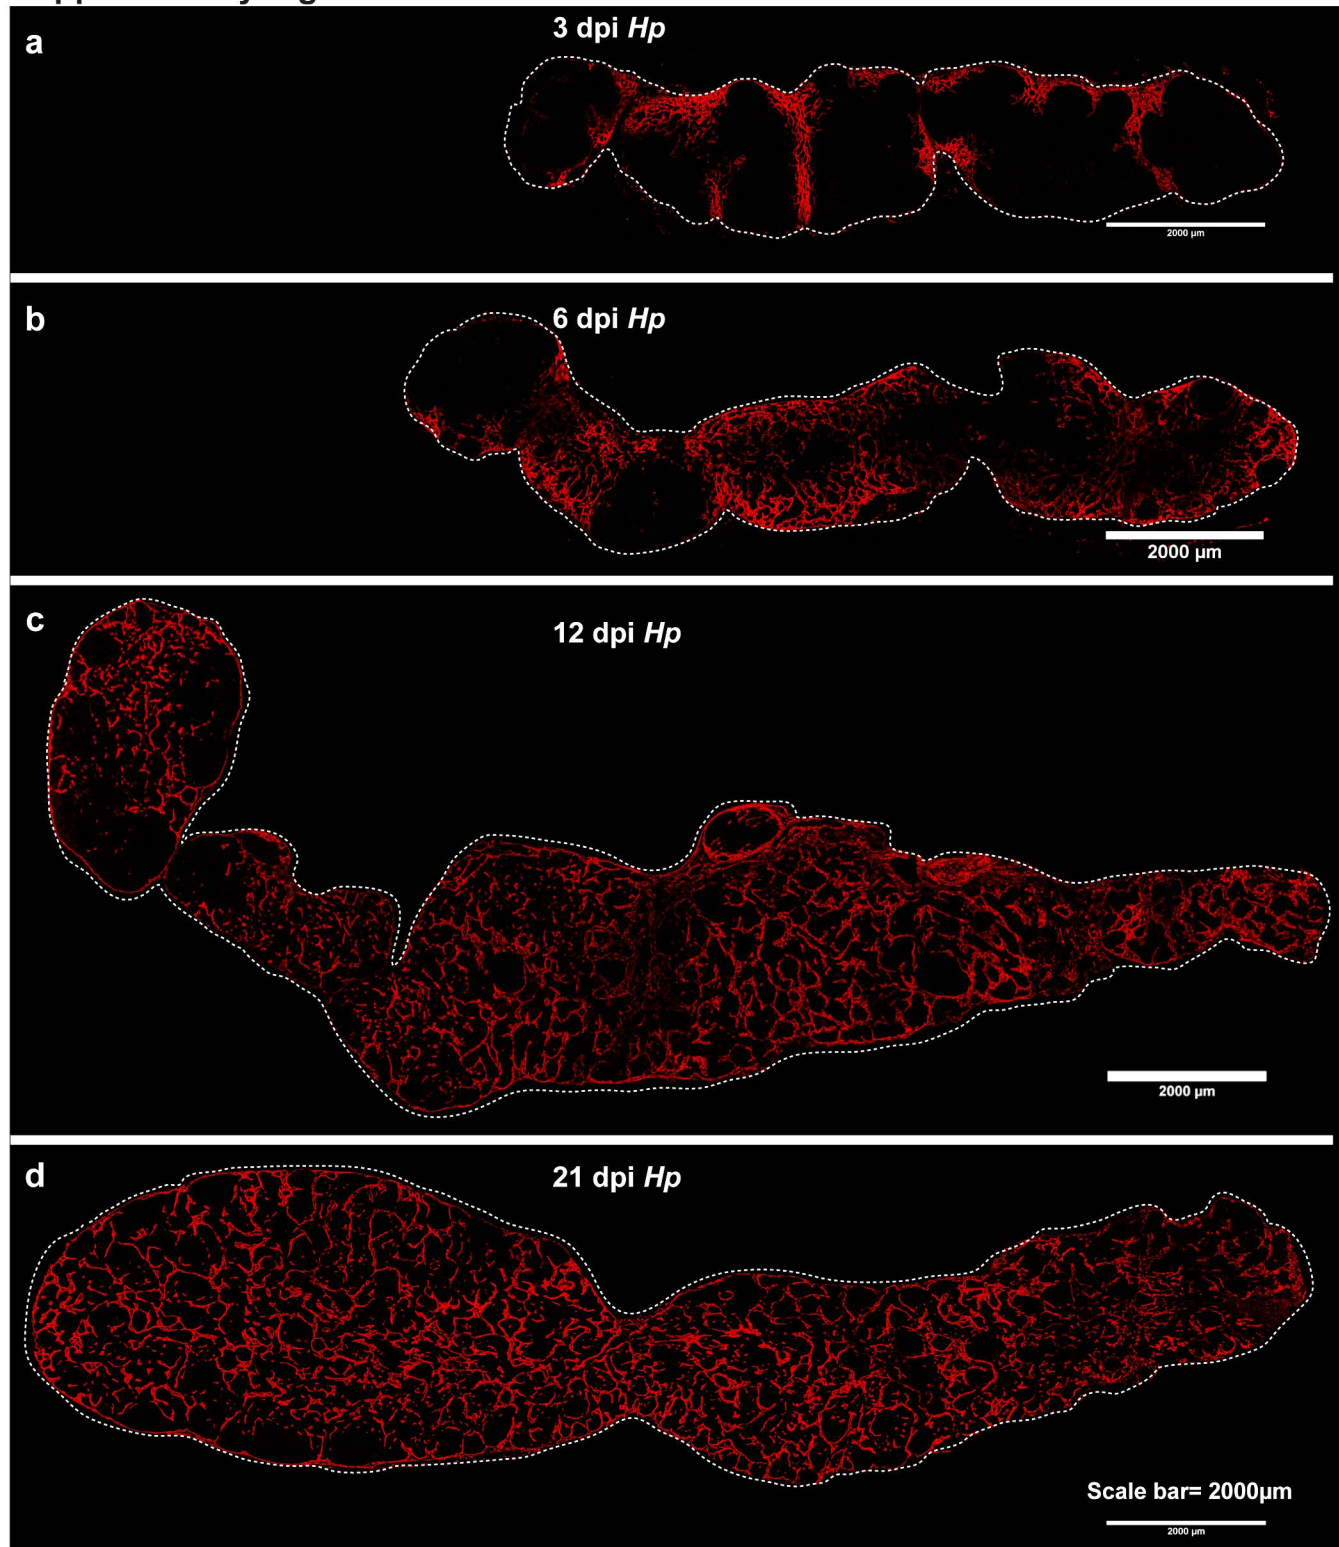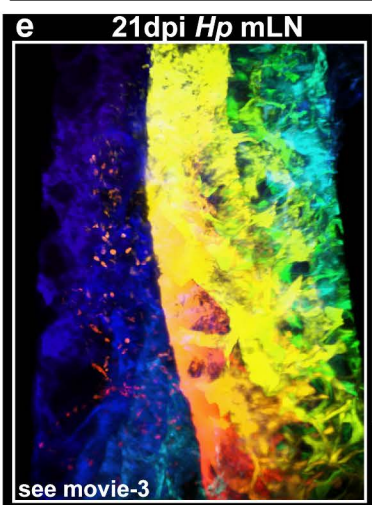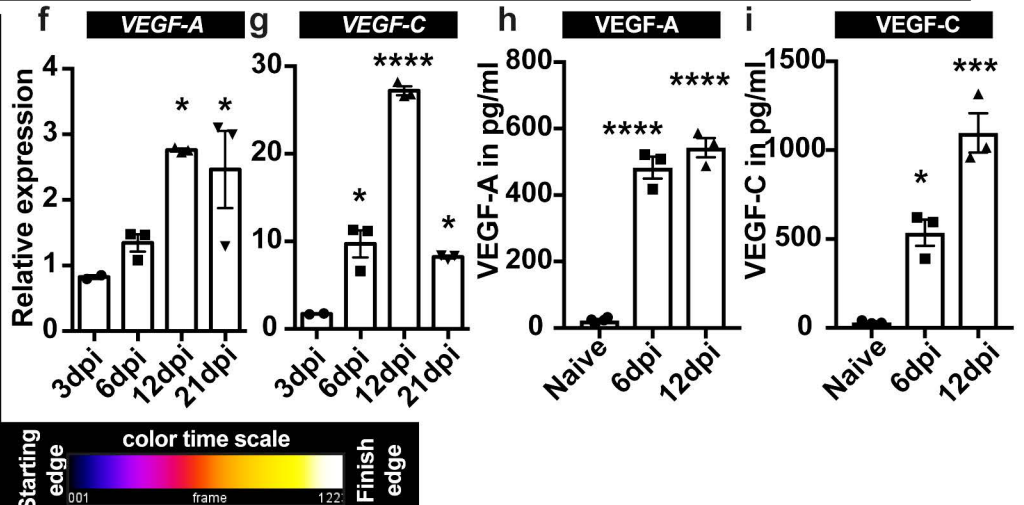

## Supplementary Figure-1

### A timecourse of mLN lymphangiogenesis in the draining mLN following *Hp* infection

C57BL/6J mice were infected with *Hp* and the entire chain of the mLN collected at the indicated time-points. **(a-d)** mLN serial cryosections showing lymphatics organization (red; LYVE1<sup>+</sup>). Scale bar =2,000  $\mu$ m. The dotted line outlines the outer capsule of the mLN. Images are representative of a single mouse from a total of five or more experiments. **(e)** LYVE-1<sup>+</sup> LECs network as visualized in a vibratome section of 21 dpi mLN by deep tissue imaging. Temporal color profile is used to indicate the lymphatic network in paracortical regions. **(f-g)** *Vegf-a* and *Vegf-c* mRNA expression during the infection time course as determined using real time PCR. **(h-i)** VEGF-A and C protein levels in mLN tissue lysate as determined by ELISA. Data represent mean  $\pm$  SEM from a single experiment and are representative of two independent experiments each including n  $\geq$ 2-3 mice per group/time point. Statistical analyses were performed using ANOVA, Bonferroni's multiple comparison test or Mann-Whitney test and significance denoted as \*p < 0.05, \*\*p < 0.01, \*\*\*p < 0.001, and \*\*\*\*p < 0.0001



## Supplementary Figure-2

### Helminth infection elicits LECs and FRCs expansion and in the mLN

Flow cytometric analysis of stromal proliferation phenotype. **(a)** Representative FACS contour plots showing Ki-67<sup>+</sup> FRCs (PDPN+CD31-) and LECs (PDPN+CD-31+) during naïve and after *Hpb* infection. **(b-c)** Histograms showing absolute number of proliferating FRCs and LECs post infection. Results are expressed as mean ± SEM.



Supplementary Figure-3

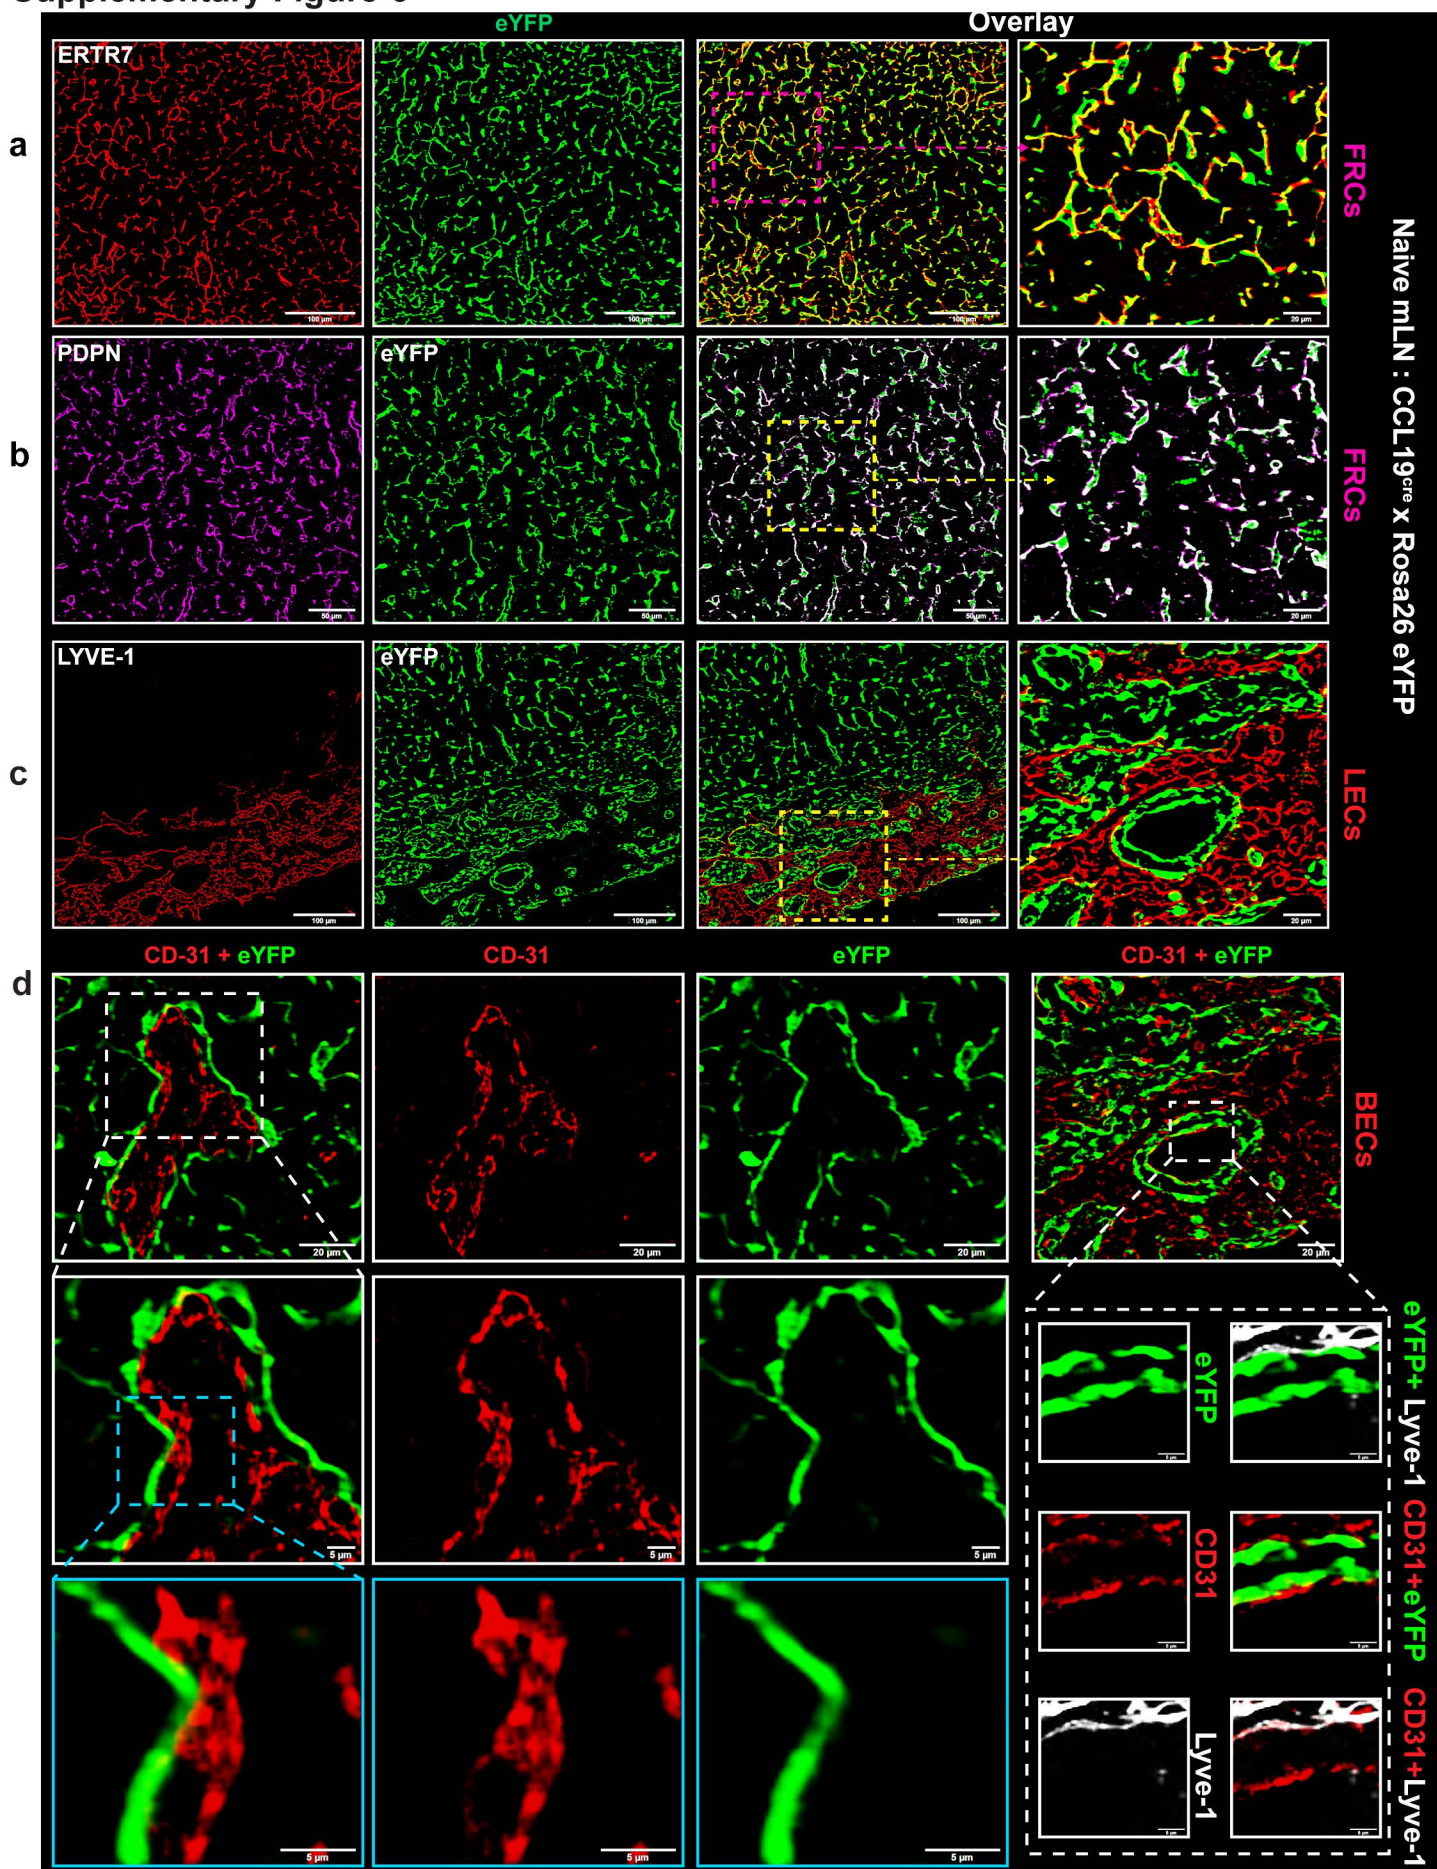

### Supplementary Figure-3

***Ccl19*<sup>Cre</sup> expression is restricted to FRCs and not present in mLN LECs, BECs or in HEVs**

**(a-c)** mLN cryosections from a *Ccl19*<sup>Cre</sup> × *Rosa26-eYFP* reporter mouse showing combined immunofluorescence staining for eYFP (green, anti-GFP exhibiting cross-reactivity with eYFP) and stromal cells (red, ER-TR7; magenta, Podoplanin) or LECs (red, LYVE-1). **(d)** *Ccl19*<sup>Cre</sup> × *Rosa26-eYFP* reporter mouse showing combined immunofluorescence staining for eYFP alongside HEVs (Red, CD31<sup>+</sup>) and BECs (Red, CD31<sup>+</sup>) stromal cells. Scale bar = 100 and 20 μm.

# Supplementary Figure-4

a *Jht KO + LT- $\beta$  KO*  $\rightarrow$  *WT*

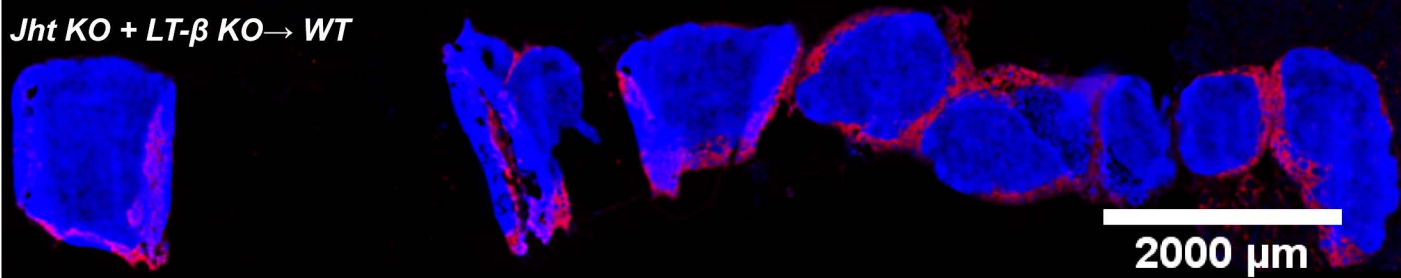

b *Jht KO + WT*  $\rightarrow$  *WT*

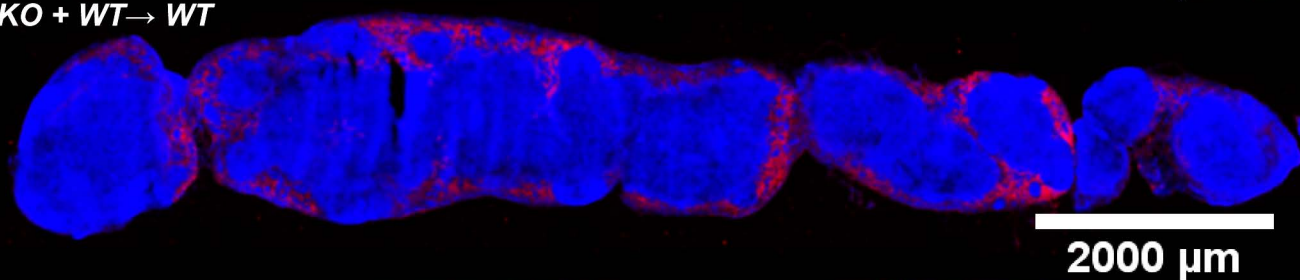

c *TCR- $\beta\delta$  KO + LT- $\beta$  KO*  $\rightarrow$  *WT*

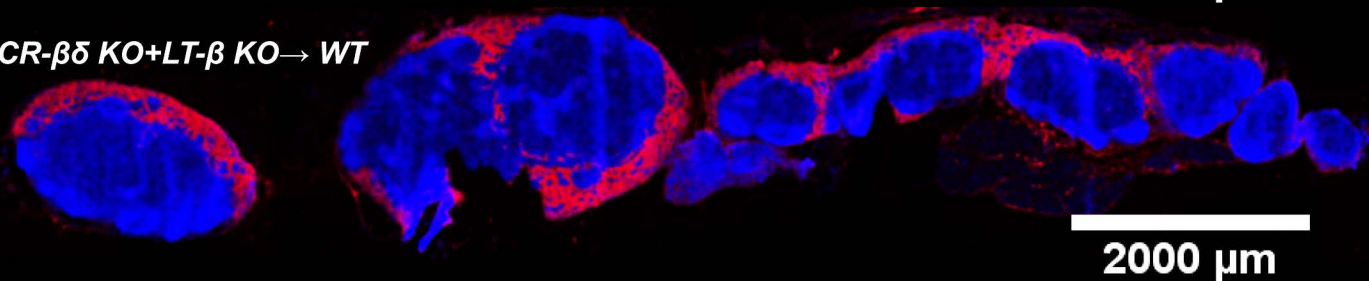

d *TCR- $\beta\delta$  KO + WT*  $\rightarrow$  *WT*

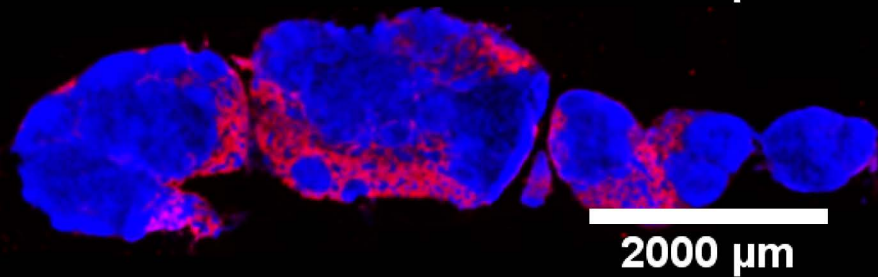

Naive mLNs: **DAPI** + **LYVE-1**



#### Supplementary Figure-4

#### Lymphatic organization in the mLN of naive bone marrow chimera mice lacking lymphotoxin expression on B cells or T cells

**(a-d)** Mixed bone marrow chimeras lacking lymphotoxin selectively on B cells ( $Jht^{-/-}$  +  $LT\beta^{-/-}$ ) or T cells ( $TCR\beta\delta^{-/-}$  +  $LT\beta^{-/-}$ ) and control chimeras ( $Jht^{-/-}$  + WT and  $TCR\beta\delta^{-/-}$  + WT) were generated and the mLN taken. Immunofluorescence images from naive mice mLN showing LECs network (LYVE-1<sup>+</sup>; red). Scale bar =2000 $\mu$ m.

# Supplemental Figure 5

**a**

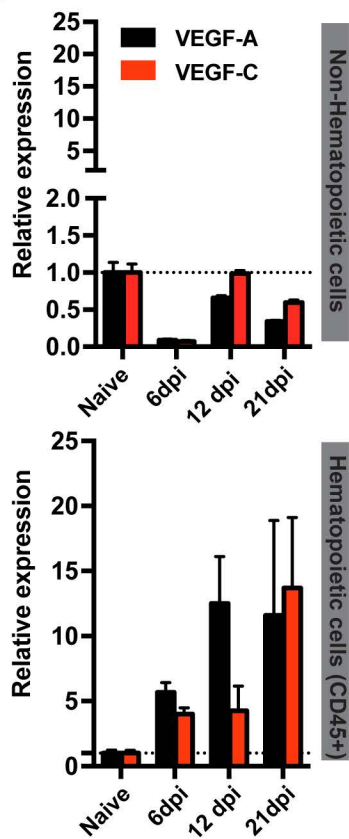

**b**

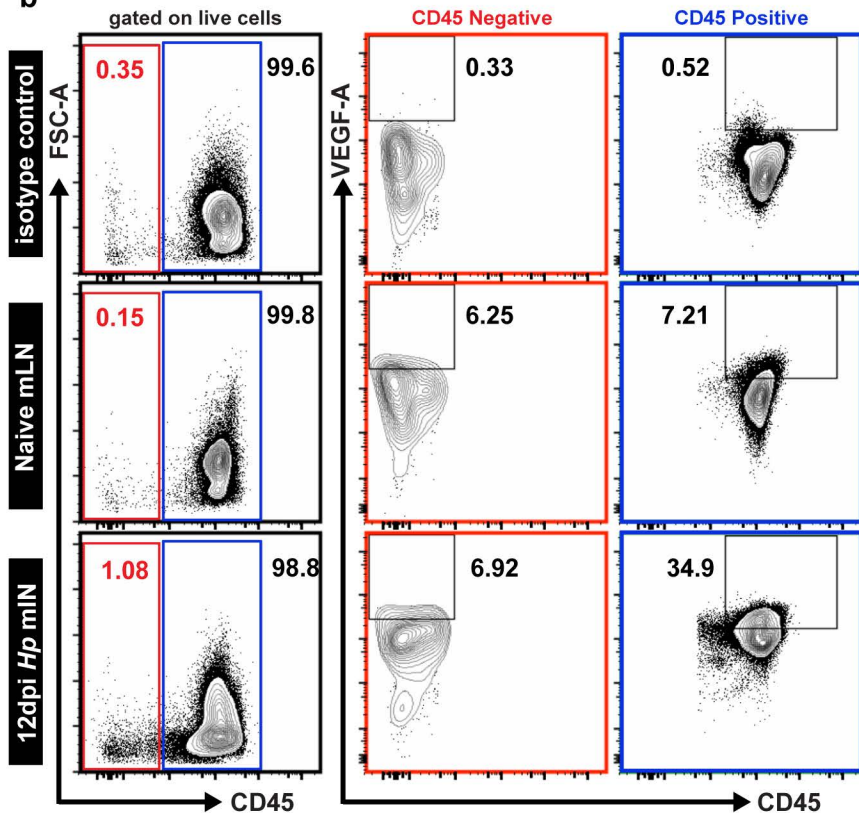

**c**

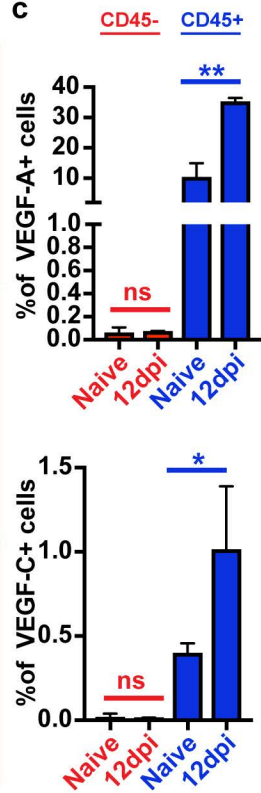

## Supplementary Figure-5

### Hematopoietic cell type represents the dominant VEGF producing compartment in the mLN of *Hp* infected mice

**(a)** Non-hematopoietic versus hematopoietic *VEGF-A* and *VEGF-C* mRNA expression during the infection time course as determined using real time PCR. Data represent mean  $\pm$  SEM from a single experiment and are representative of two independent experiments each including  $n \geq 2-3$  mice per group/time point. **(b)** Gating strategy-showing identification of VEGFs producing hematopoietic and non-hematopoietic population. **(c)** Pooled data showing the percentage of VEGF-A/C<sup>+</sup> CD45<sup>+</sup> cells (blue histograms) and CD45<sup>-</sup> (red histograms) cells as determined in b.

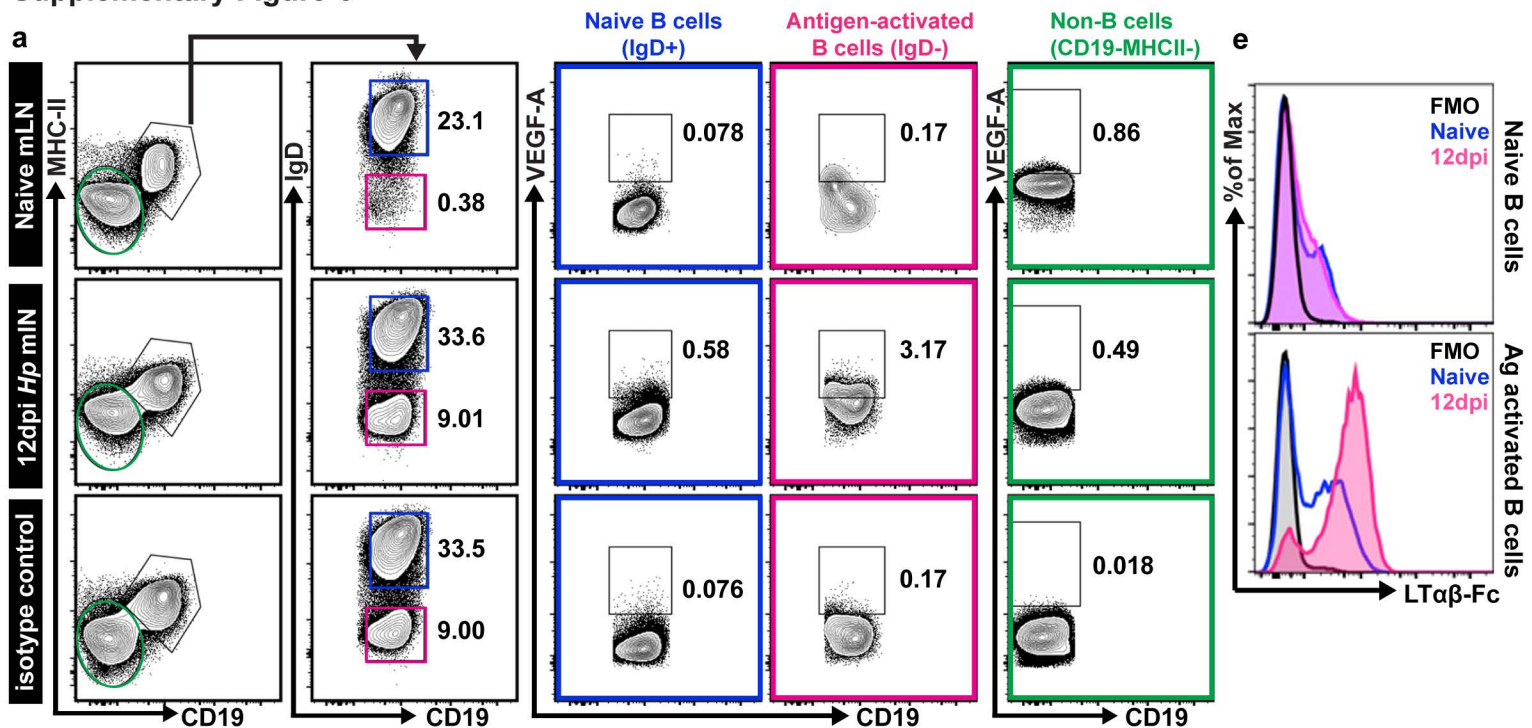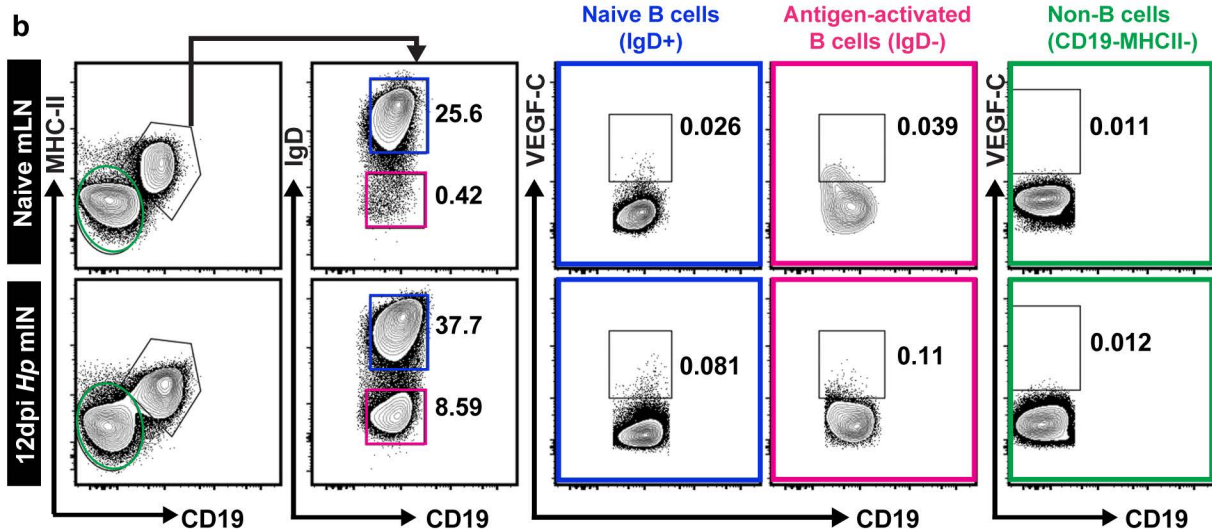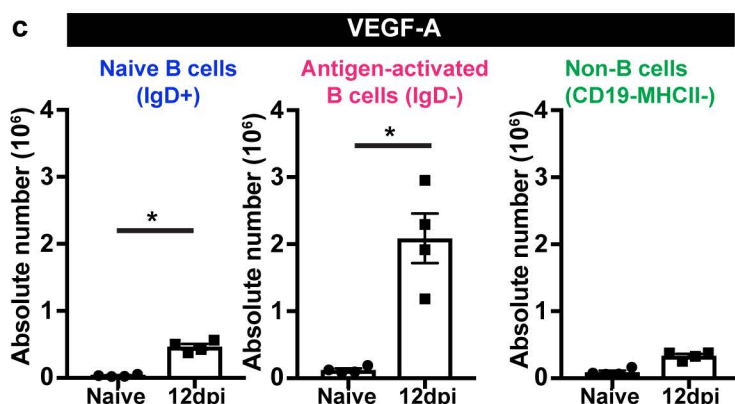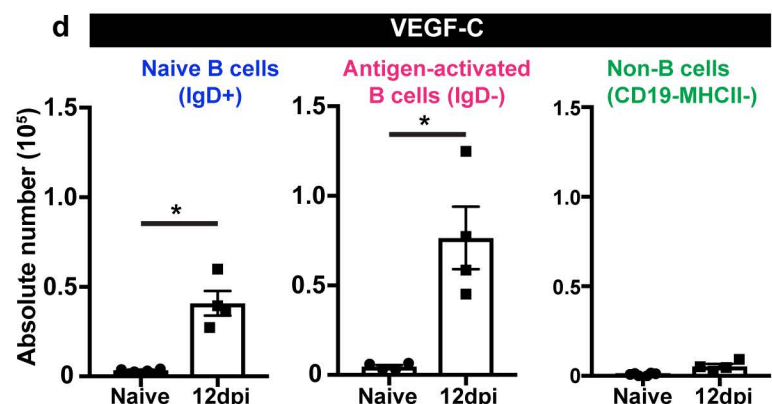



## Supplementary Figure-6

### **B cells represent the dominant VEGF producing hematopoietic cell type in the mLN of *Hp* infected mice**

**(a-b)** Representative dot plots showing gating strategy for identification of VEGFs producing naïve ( $CD19^+MHC-II^+IgD^+$ ) and activated B cells ( $CD19^+MHC-II^+IgD^-$ ) post infection. **(c-d)** Data showing the absolute number of VEGFs<sup>+</sup> naïve or activated B cells and non-B cells, as determined in **a-b**. **(e)** B cell lymphotoxin expression was determined by staining with  $LT\beta R-Fc$ . Histograms represent the lymphotoxin expression on naïve B cells (top panel) and activated B cells (bottom panel) during naïve and 12dpi mLN. Lymphotoxin expression was higher in activated B cells compared to naïve B cells at 12dpi (bottom panel). Data represent mean  $\pm$  SEM from a single experiment and are representative of two or more independent experiments each including n=4 mice/group/time-point. Statistical analyses were performed using non parametric Mann-Whitney T test and significance denoted as \* $p < 0.05$ .

# Supplementary Figure-7

a

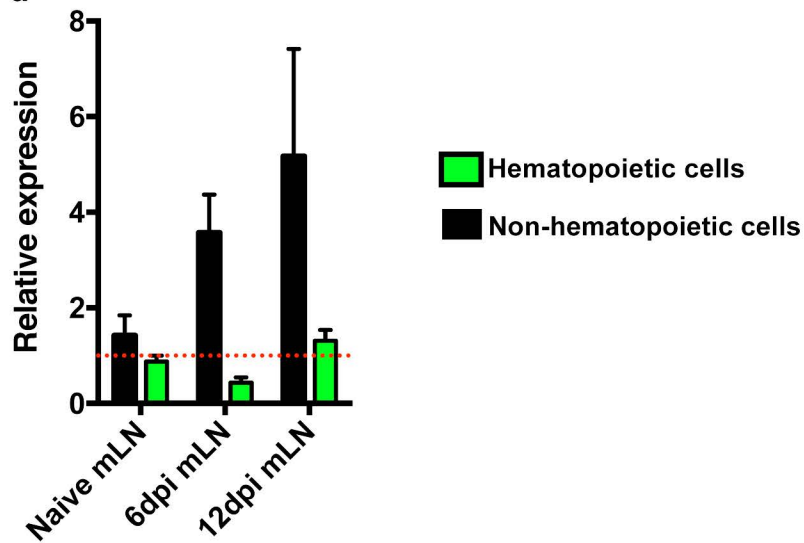

b

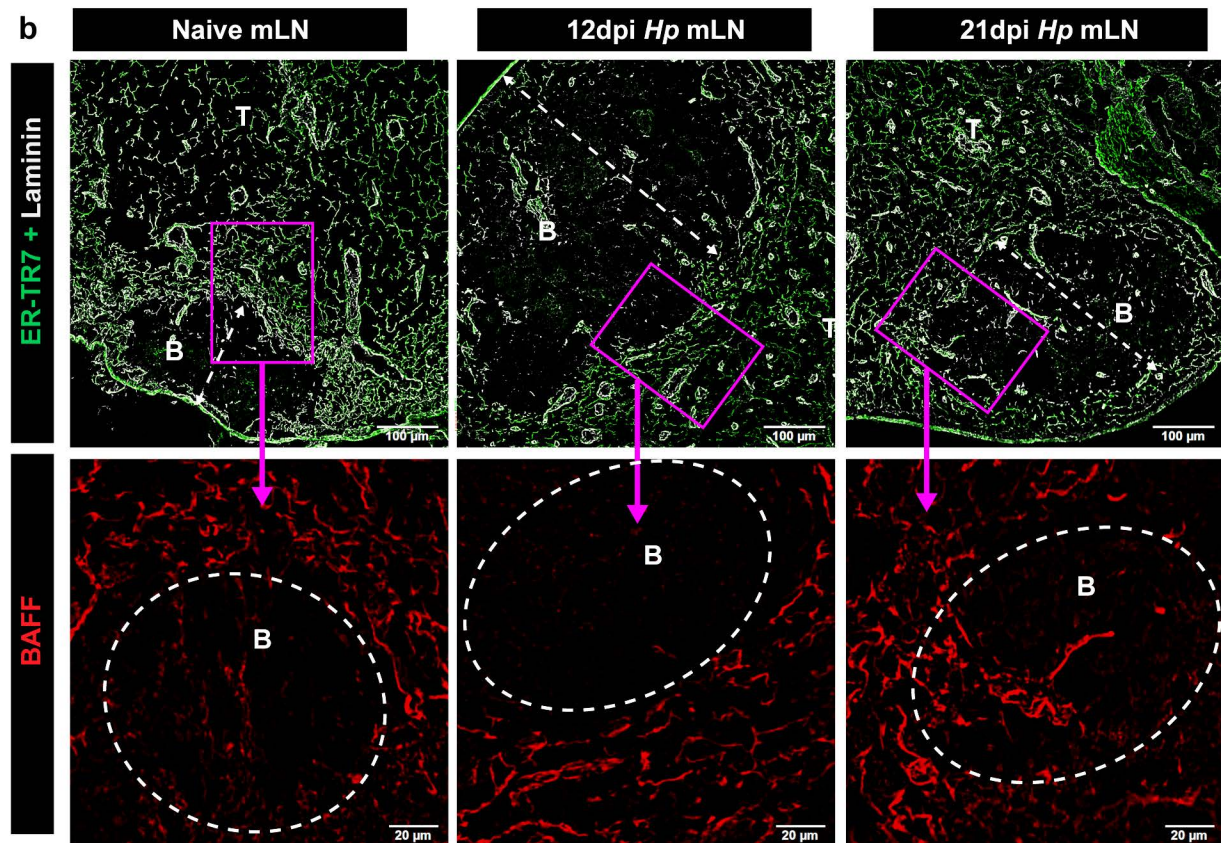

## Supplementary Figure-7

### FRCs surround B cell follicles produce BAFF

Wildtype C57BL/6 mice were infected with *Hp* and the entire chain of the mLN collected at the indicated time-points. **(a)** *BAFF* mRNA expression by mLN stromal (non-hematopoietic cells) versus cellular (hematopoietic cells) components following *Hp* infection. Data represent mean  $\pm$  SEM, and are representative of two independent experiments with  $n \geq 2-3$  mice per group/time point. **(b)** Images of mLN cryosections showing BAFF protein (red) and FRCs (green, ER-TR7<sup>+</sup>; white, laminin<sup>+</sup>) around a B cell follicle. Scale bar = 100  $\mu$ m. B cell follicles are outlined by a white dotted line and arrows indicate the change in follicle size post infection. Magenta insets are also shown at higher magnification (Scale bar = 20  $\mu$ m) and show BAFF expression at the mantle region of B cell follicle.

Supplementary Figure-8

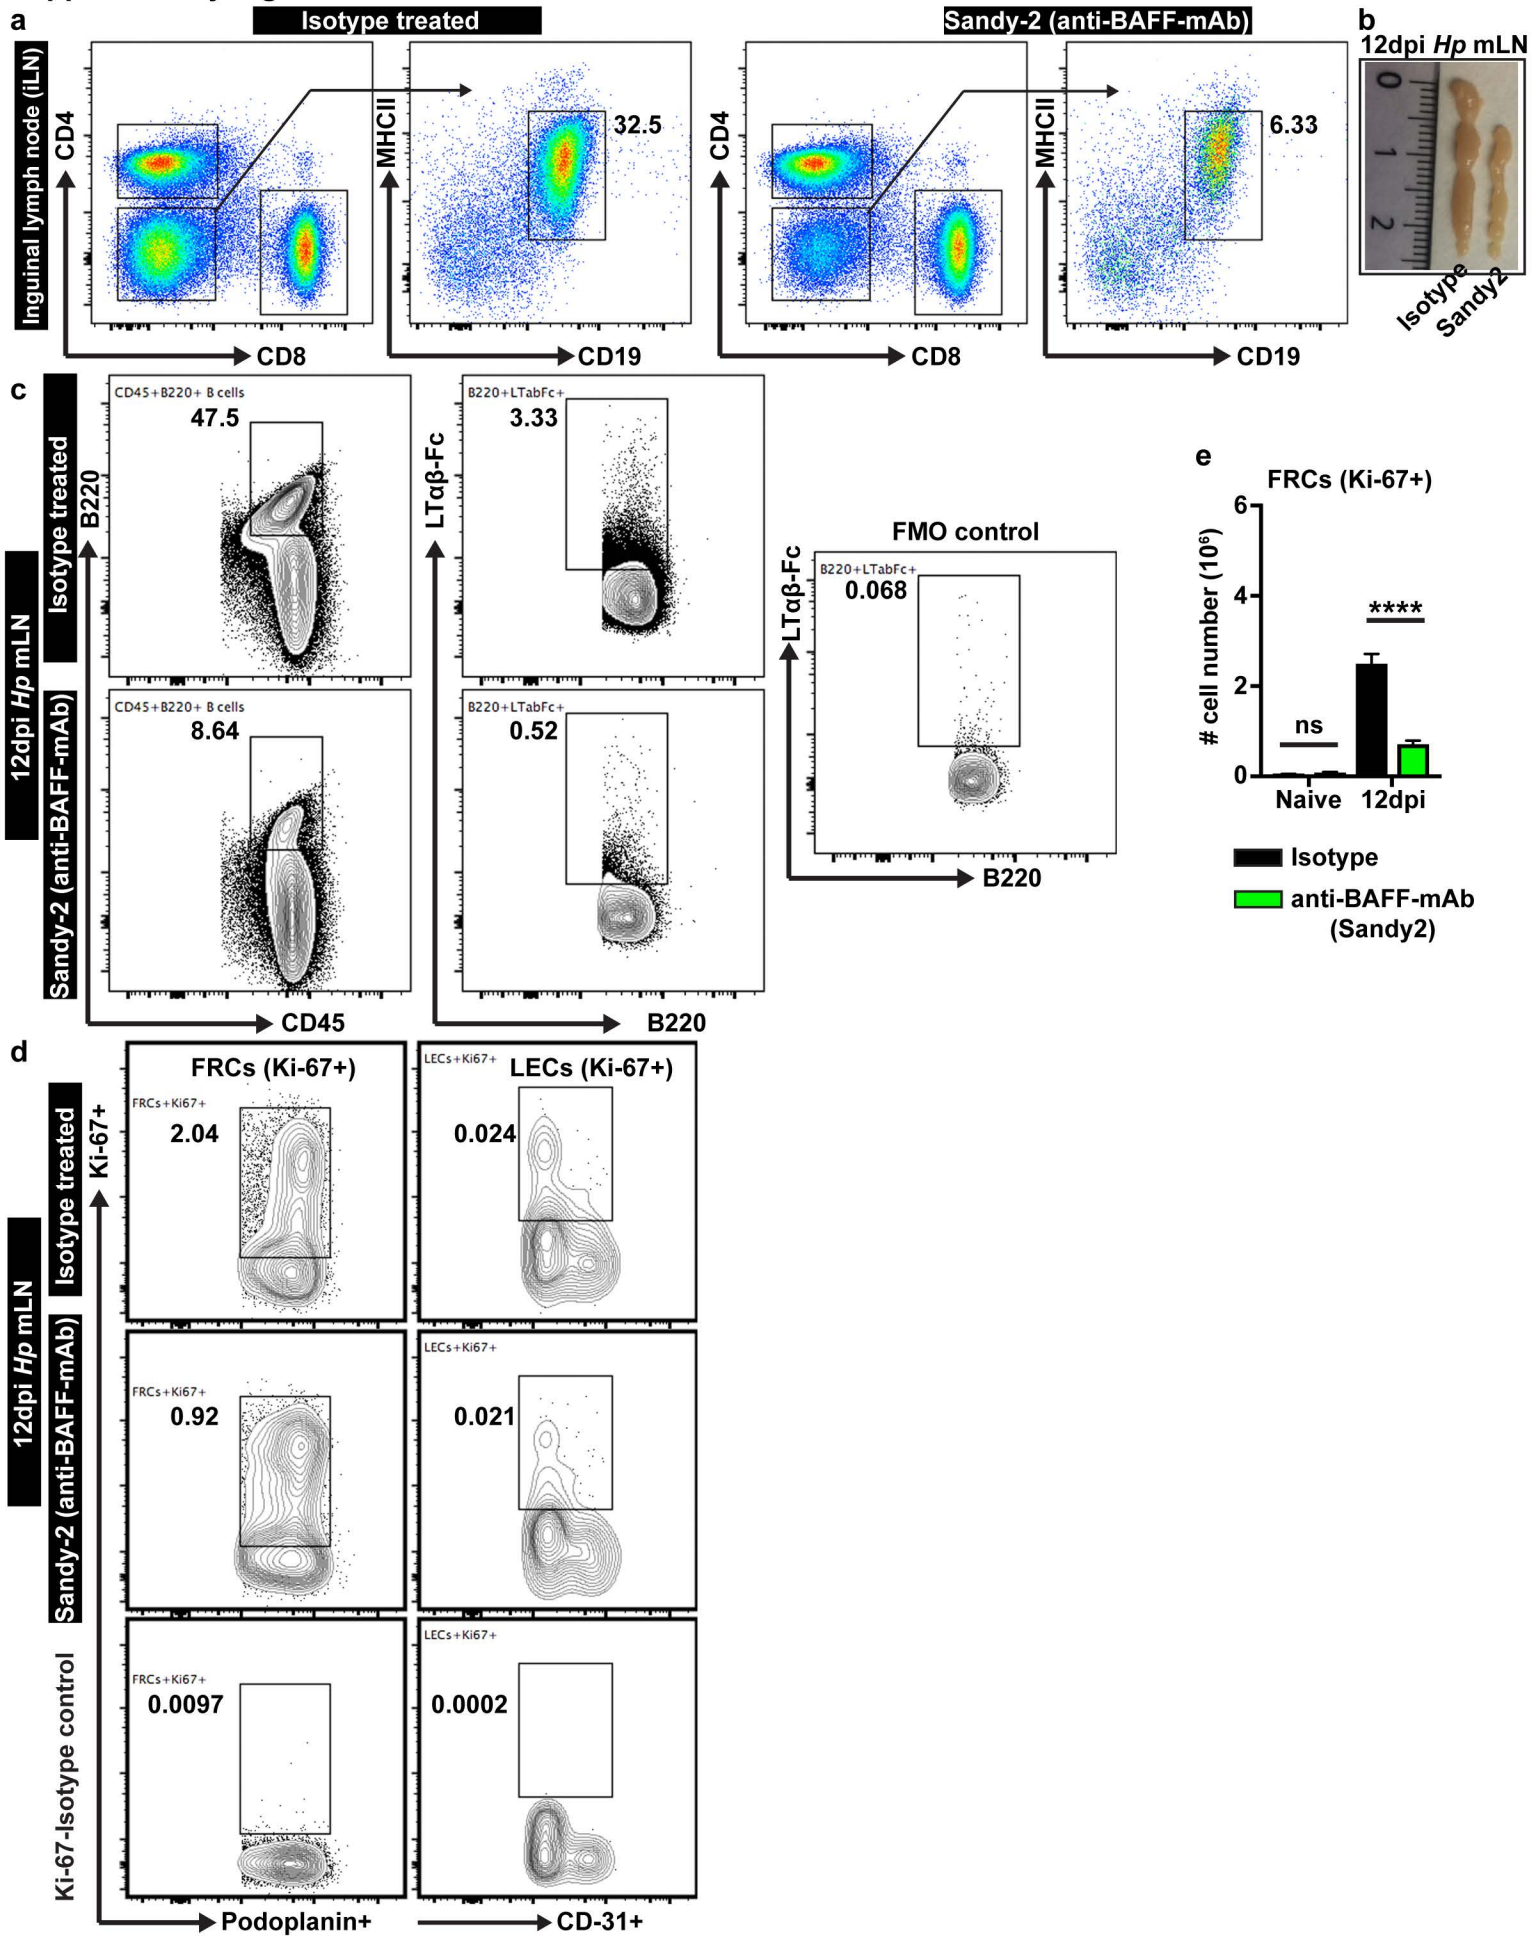



## Supplementary Figure-8

### Expansion of lymphotoxin expressing B cells and FRCs proliferation is reduced in mice treated with Sandy-2 (Anti m-BAFF mAb)

**(a)** FACS profile of inguinal lymph node (iLN) B and T cells after isotype or Sandy-2 mAb treatment. B cells were identified as CD4<sup>-</sup>CD8<sup>-</sup>CD19<sup>+</sup>MHCII<sup>+</sup>. Sandy-2 treatment significantly reduces the B cell numbers in iLN. **(b)** Mice were treated with two doses of isotype control or anti-BAFF (Sandy-2) mAb and infected with *Hp*. mLN gross morphology visualized at 12dpi. **(c)** Representative dot plots showing gating strategy for identification of LT $\alpha$ -Fc<sup>+</sup> B cells after isotype or Sandy-2 treatment. **(d)** Representative contour plots showing gating strategy for identification of proliferating FRCs (CD31-MadCAM1-GP38+Ki67+) and LECs after isotype or Sandy-2 treatment. **(e)** Absolute number of proliferating FRCs in mice (treated with isotype or Sandy-2 mAb) post *Hp* infection. Data represent mean  $\pm$  SEM and representative of two independent experiments with n=3-5 mice/group/time-point. Statistical analyses were performed using ANOVA, Bonferroni's multiple comparison test and significance denoted as \*p < 0.05, \*\*p < 0.01, \*\*\*p < 0.001, and \*\*\*\*p < 0.0001.

**Related to Experimental procedure  
Supplementary Table-1**

| S.No. | Target          | Species          | Clone       | Conjugate    | Catalogue No | Supplier        |
|-------|-----------------|------------------|-------------|--------------|--------------|-----------------|
| 1     |                 |                  |             |              |              |                 |
| 2     | B220            | Rat              | RA3-6B2     | Pacific Blue | 103227       | Biolegend       |
| 3     | CD11c           | Armenian Hamster | N418        | APC          | 117310       | Biolegend       |
| 4     | CD19            | Rat              | 6D5         | APC          | 115512       | Biolegend       |
| 5     | CD19            | Rat              | 6D5         | APC/fire-750 | 115513       | Biolegend       |
| 6     | CD3             | Rat              | 17A2        | Alexa 700    | 100216       | Biolegend       |
| 7     | CD31            | Rat              | 390         | Pacific blue | 102422       | Biolegend       |
| 8     | CD31            | Rat              | 390         | PE           | 102408       | Biolegend       |
| 9     | CD35            | Rat              | 7E9         | Alexa 488    | 123408       | Biolegend       |
| 10    | CD4             | Rat              | RM4-5       | PE           | 100512       | Biolegend       |
| 11    | CD45            | Rat              | 30-F11      | Alexa 488    | 103122       | Biolegend       |
| 12    | CD45            | Rat              | 30-F11      | PEcy7        | 103114       | Biolegend       |
| 13    | CD45            | Rat              | 30-F11      | Pacific Blue | 103126       | Biolegend       |
| 14    | VEGF-A          | Rabbit           |             | Purified     | 103-PA03     | Relia Tech Gmbh |
| 15    | GL7             | Rat              | GL7         | Biotin       | 13-5902-85   | eBiosciences    |
| 16    | IgD             | Rat              | 11-26c.2a   | Alexa 700    | 405730       | Biolegend       |
| 17    | Isotype Ctr IgG | Rat              | RTK2758     | Alexa 488    | 400525       | Biolegend       |
| 18    | Isotype Ctr IgG | Rat              | RTK4530     | Alexa 700    | 400628       | Biolegend       |
| 19    | Isotype Ctr IgG | Rat              | eBRG1       | Biotin       | 13-4301      | eBiosciences    |
| 20    | Ki-67           | Set              | B56/MOPC-21 | PE           | 556027       | BD Pharmingen   |
| 21    | LTbR-Fc         | ----             | recombinant | purified     | ----         | Biogen Idec     |
| 22    | Lyve-1          | Rat              | Lyve-1      | Alexa 488    | FAB2125G     | R&D systems     |
| 23    | MHC Class II    | Rat              | M5/114.15.2 | Alexa 700    | 107622       | Biolegend       |
| 24    | Podoplanin      | Syrian Hamster   | 8.1.1       | Alexa 647    | in house     | Hybridoma       |
| 25    | Podoplanin      | Syrian Hamster   | eBio8.1.1   | eFluor 660   | 50-5381      | eBiosciences    |
| 26    | Streptavidin    | ----             | ----        | PE           | 405204       | Biolegend       |
| 27    | Streptavidin    | ----             | ----        | APC          | 17-4317-82   | eBiosciences    |
| 28    | Ter119          | Rat              | Ter119      | Varies       | 116231/215   | Biolegend       |

**Gating strategy**

|                           |                                                  |
|---------------------------|--------------------------------------------------|
| FRCs                      | Live cells, Ter119-CD45-CD31-MaDCAM1-GP38+       |
| Proliferating FRCs        | Live cells, Ter119-CD45-CD31-MaDCAM1-GP38+Ki-67+ |
| LECs                      | Live cells, Ter119-CD45-CD31+GP38+               |
| Proliferating LECs        | Live cells, Ter119-CD45-CD31+GP38+Ki-67+         |
| Naive B cells             | Live cells, CD19+IgD+MHCII+                      |
| Antigen Activated B cells | Live cells, CD19+IgD-MHCII+                      |
| Ltab-Fc+ B cells          | Live cells, CD45+B220+Ltab-Fc+                   |

**Related to Experimental procedure**  
**Supplementary Table-2**

| S.No.                       | Target                  | Species          | Clone      | Conjugate    | Catalogue No | Supplier                | Dilution  |
|-----------------------------|-------------------------|------------------|------------|--------------|--------------|-------------------------|-----------|
| <b>Primary Antibodies</b>   |                         |                  |            |              |              |                         |           |
| 1                           | B220                    | Rat              | RA3-6B2    | Biotin       | RM2615       | Life Technologies       | 1:200     |
| 2                           | B220                    | Rat              | RA3-6B2    | Purified     | 103202       | BioLegend               | 1:100     |
| 3                           | CD3                     | Armenain hamster | 145-2C11   | Purified     | 100302       | BioLegend               | 1:100     |
| 4                           | CD35                    | Rat              | 8C12       | Purified     | 558768       | BD Pharmingen           | 1:100     |
| 5                           | DAPI                    | -----            | -----      | Powder       | D9542        | Sigma-Aldrich           | -----     |
| 6                           | ER-TR7                  | Rat              | ER-TR7     | Purified     | T-2109       | BMA Biomedicals         | 1:200     |
| 7                           | FDCs                    | Rat              | FDC-M1     | Purified     | 551320       | BD Pharmingen           | 1:200     |
| 8                           | CD11c                   | Armenain hamster | N418       | Purified     | 117308       | BioLegend               | 1:50      |
| 9                           | GL7                     | Rat              | GL7        | Biotin       | 13-5902-85   | eBiosciences            | 1:50      |
| 10                          | Podoplanin (Pdpn)       | Syrian Hamster   | 8.1.1      | Purified     | -----        | Hybridoma               | 1:100     |
| 11                          | IgD                     | Rat              | 11-26c     | Purified     | 1120-01      | Southern Biotech        | 1:400     |
| 12                          | Laminin                 | Rabbit           | ----       | Purified     | L9393        | Sigma-Aldrich           | 1:200     |
| 13                          | Lyve-1                  | Rabbit           | APA5       | Purified     | 103-PA50     | Relia Tech GmbH         | 1:200     |
| 14                          | BAFF                    | Goat             | ----       | Purified     | AF2106       | R&D systems             | 5-10ug/ml |
| 15                          | CD31                    | Rat              | 390        | Purified     | -----        | Histology Core (EPFL)   | -----     |
| <b>Secondary Antibodies</b> |                         |                  |            |              |              |                         |           |
| 1                           | Anti Armenian hamster   | Goat             | Polyclonal | Alexa 594    | 127-585-160  | Jackson Immuno Research | 1:400     |
| 2                           | Anti Armenian hamster   | Goat             | Polyclonal | Dylight 594  | 405504       | Biolegend               | 1:200     |
| 3                           | Anti Rabbit IgG         | Donkey           | Polyclonal | Alexa 488    | A21206       | Molecular Probes        | 1:600     |
| 4                           | Anti Rabbit IgG         | Donkey           | Polyclonal | Alexa 568    | A10042       | Molecular Probes        | 1:800     |
| 5                           | Anti Rabbit IgG         | Donkey           | Polyclonal | Alexa 647    | A31573       | Invitrogen              | 1:400     |
| 6                           | Anti Rat IgG            | Donkey           | Polyclonal | Alexa 488    | A21208       | Molecular Probes        | 1:400     |
| 7                           | Anti Rat IgG            | Goat             | Polyclonal | Alexa 568    | A11077       | Molecular Probes        | 1:800     |
| 8                           | Anti Rat IgG            | Donkey           | Polyclonal | Biotin       | 712-065-153  | Jackson Immuno Research | 1:200     |
| 9                           | Anti Syrian hamster IgG | Goat             | Polyclonal | Alexa 647    | 107-606-142  | Jackson Immuno Research | 1:400     |
| 10                          | Anti Syrian hamster IgG | Goat             | Polyclonal | Alexa 488    | 107-545-142  | Jackson Immuno Research | 1:333     |
| 11                          | Streptavidin            | -----            | -----      | Alexa 488    | S-11223      | Molecular Probes        | 1:800     |
| 12                          | Streptavidin            | -----            | -----      | Alexa 568    | S-11226      | Molecular Probes        | 1:800     |
| 13                          | Streptavidin            | -----            | -----      | Pacific blue | S-11222      | Invitrogen              | 1:100     |
| 14                          | Streptavidin            | -----            | -----      | Alexa 647    | S-21374      | Invitrogen              | 1:800     |
